# Supplementary material for: Real-Time Monitoring on the Chinese Giant Salamander Using RPA-LFD
Source: MDPI journal article supplement (doi:10.3390/ijms25094946), 2024-05-01
Supplement: s1 [file s1]

**Table S1. Sampling sites for testing RPA-LFD method in the field**

| Sites                                          | Longitudes  | Latitudes  |
|------------------------------------------------|-------------|------------|
| Rare Aquatic Animal Research Institute (RAARI) | 117°59'29"E | 29°38'32"N |
| Ruanxi Mountain                                | 118°7'46"E  | 30°17'31"N |
| Fuxi Town                                      | 118°12'55"E | 29°57'41"N |
| Tangkou Town                                   | 118°10'1"E  | 30°39'36"N |
